# Supplementary material for: Electrochromic properties of novel octa-pinene substituted double-decker Ln(iii) (Ln = Eu, Er, Lu) phthalocyanines with distinctive near-IR absorption
Source: Royal Society of Chemistry journal article supplement (doi:10.1039/c5tc00020c), 2015-01-01
Supplement: c5tc00020c1.pdf [file c5tc00020c1.pdf]

## Supporting Information

### **Electrochromic properties of novel octa-pinene substituted double-decker Ln(III) (Ln = Eu, Er, Lu) phthalocyanines with distinctive near-IR absorption**

Wei Zheng, Bei-Bei Wang, Jian-Cheng Lai, Cheng-Zhang Wan, Xin-Rong Lu, Cheng-Hui Li\*, and Xiao-Zeng You\*

Content lists:

**Figure S1.** MALDI-TOF mass spectra of compounds **ErPc\*<sub>2</sub>** with DHB as the matrix; isotopic patterns for the corresponding molecular ions are shown in insets.

**Figure S2.** MALDI-TOF mass spectra of compounds **LuPc\*<sub>2</sub>** with DHB as the matrix; isotopic patterns for the corresponding molecular ions are shown in insets.

**Figure S3.** A simplified molecular orbit diagram for **LnPc\*<sub>2</sub>**.

**Figure S4.** Electronic circular dichroism spectra for **LnPc\*<sub>2</sub>** in DCM. ( $C_{\text{EuPc}^*_2} = 1.05 \times 10^{-5}$  mol/L,  $C_{\text{ErPc}^*_2} = 1.46 \times 10^{-5}$  mol/L,  $C_{\text{LuPc}^*_2} = 1.00 \times 10^{-5}$  mol/L)

**Figure S5.** SWV of **LnPc\*<sub>2</sub>** on Pt (glassy carbon) in DCM/TBAP (-0.2 ~ 2 V) and DMF/TBAP (-2.8 ~ -1 V), SWV parameters: pulse size = 100 mV; step size: 5 mV; frequency: 25 Hz. (a) **EuPc\*<sub>2</sub>**; (a) **ErPc\*<sub>2</sub>**; (a) **LuPc\*<sub>2</sub>**;

**Figure S6.** *In-situ* UV/Vis spectral changes of **ErPc\*<sub>2</sub>** in DCM containing 1M TBAP at (a) 0.8 V; (b) -0.2 V; (c) -1.4 V. (vs. SCE)

**Figure S7.** *In-situ* UV/Vis spectral changes of **LuPc\*<sub>2</sub>** in DCM containing 1M TBAP at (a) 0.8 V; (b) -0.2 V; (c) -1.4 V. (vs. SCE)

**Figure S8.** T% changes of **ErPc\*<sub>2</sub>**/ITO at two wavelengthes versus time by repeating the potential steps using 0 V and +1.0 V with a residence time of 25 s in H<sub>2</sub>O/LiClO<sub>4</sub> electrolyte system.

**Figure S9.** T% changes of **LuPc\*<sub>2</sub>**/ITO at two wavelengthes versus time by repeating the potential steps using 0 V and +1.0 V with a residence time of 25 s in H<sub>2</sub>O/LiClO<sub>4</sub> electrolyte system.

**Table S1.** Maximum concentration of **LnPc\*<sub>2</sub>** dissolved in different solvents .

**Table S2.** UV/Vis/NIR absorption data for **LnPc\*<sub>2</sub>**.

**Table S3.** Coloration efficiency of **LnPc\*<sub>2</sub>**.

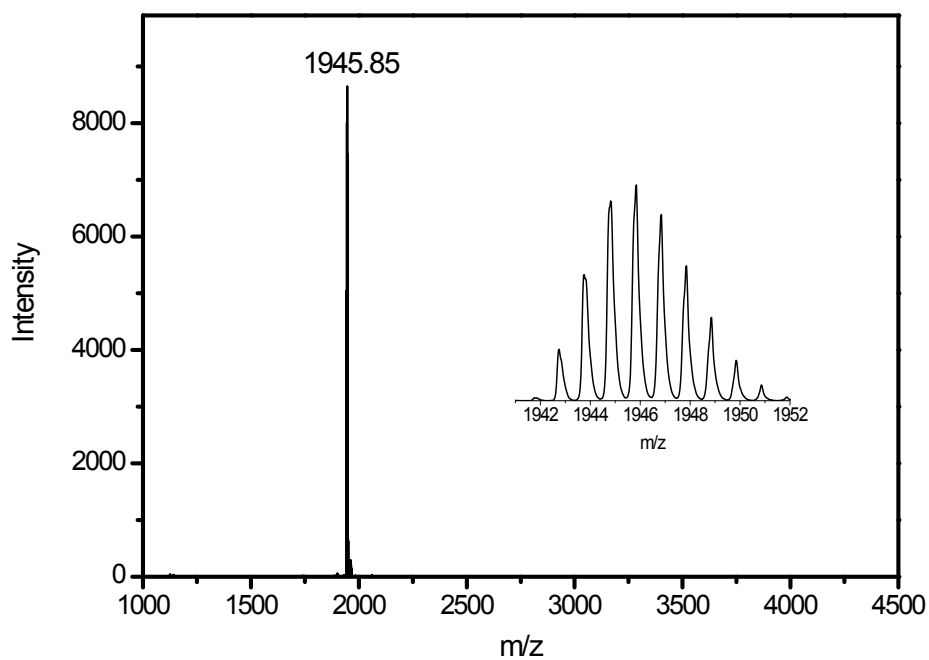

**Figure S1.** MALDI-TOF mass spectra of compounds  $\text{ErPc}^*_2$  with DHB as the matrix; isotopic patterns for the corresponding molecular ions are shown in insets.

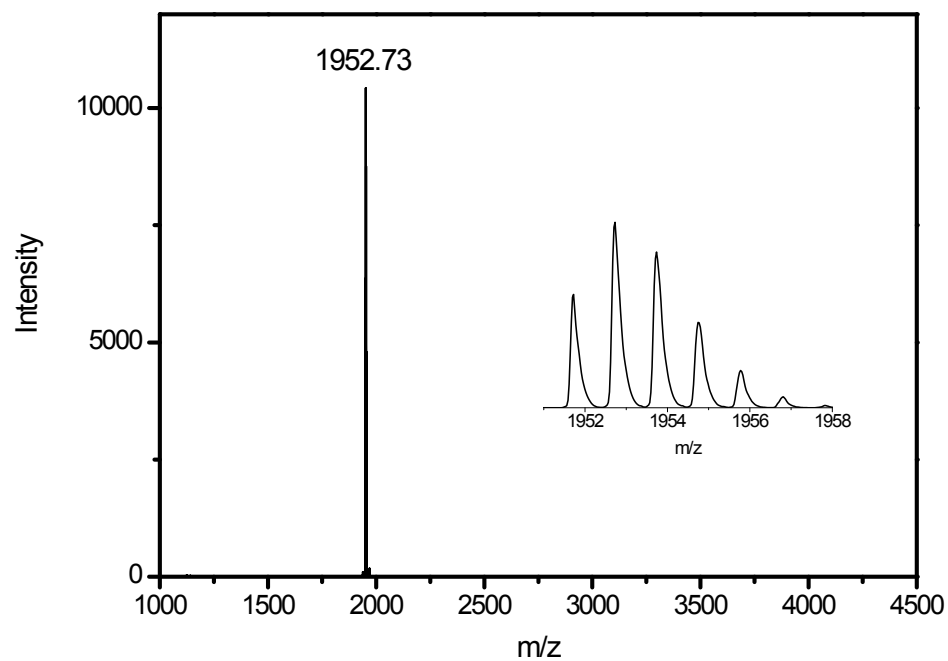

**Figure S2.** MALDI-TOF mass spectra of compounds  $\text{LuPc}^*_2$  with DHB as the matrix; isotopic patterns for the corresponding molecular ions are shown in insets.

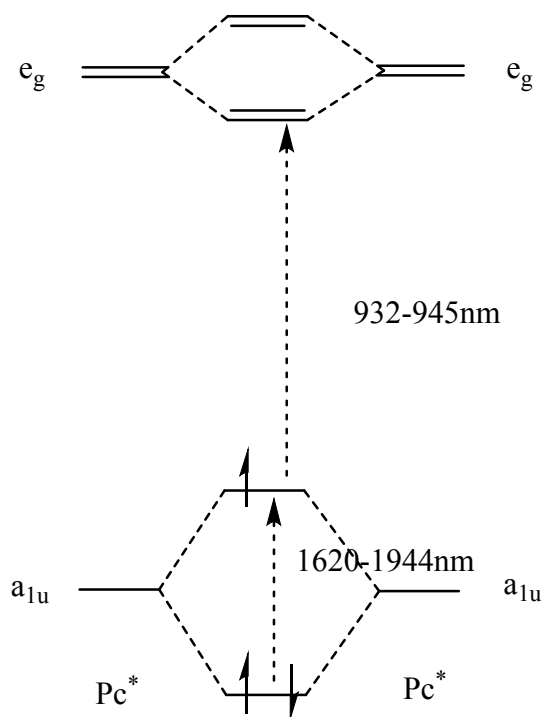

**Figure S3.** A simplified molecular orbit diagram for  $\text{LnPc}^*_2$ .

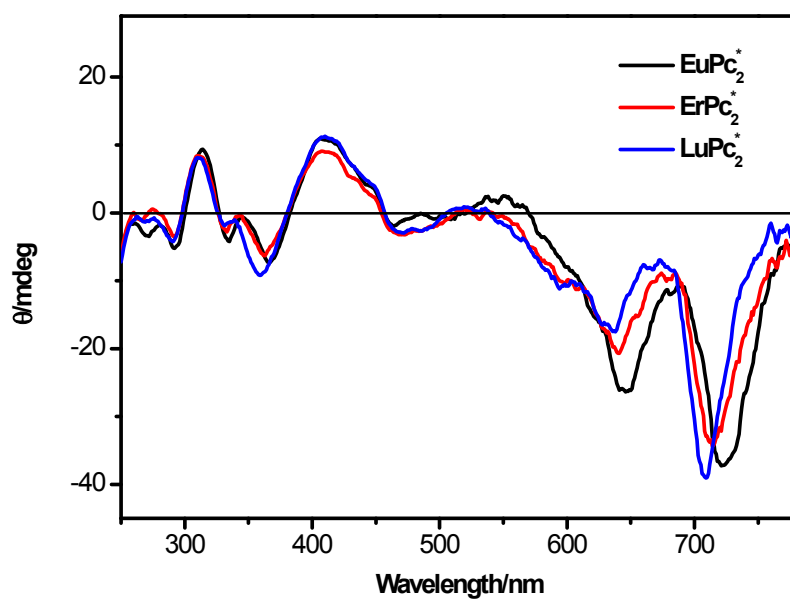

**Figure S4.** Electronic circular dichroism spectra for  $\text{LnPc}^*_2$  in DCM. ( $C_{\text{EuPc}^*_2} = 1.05 \times 10^{-5} \text{ mol/L}$ ,  $C_{\text{ErPc}^*_2} = 1.46 \times 10^{-5} \text{ mol/L}$ ,  $C_{\text{LuPc}^*_2} = 1.00 \times 10^{-5} \text{ mol/L}$ )

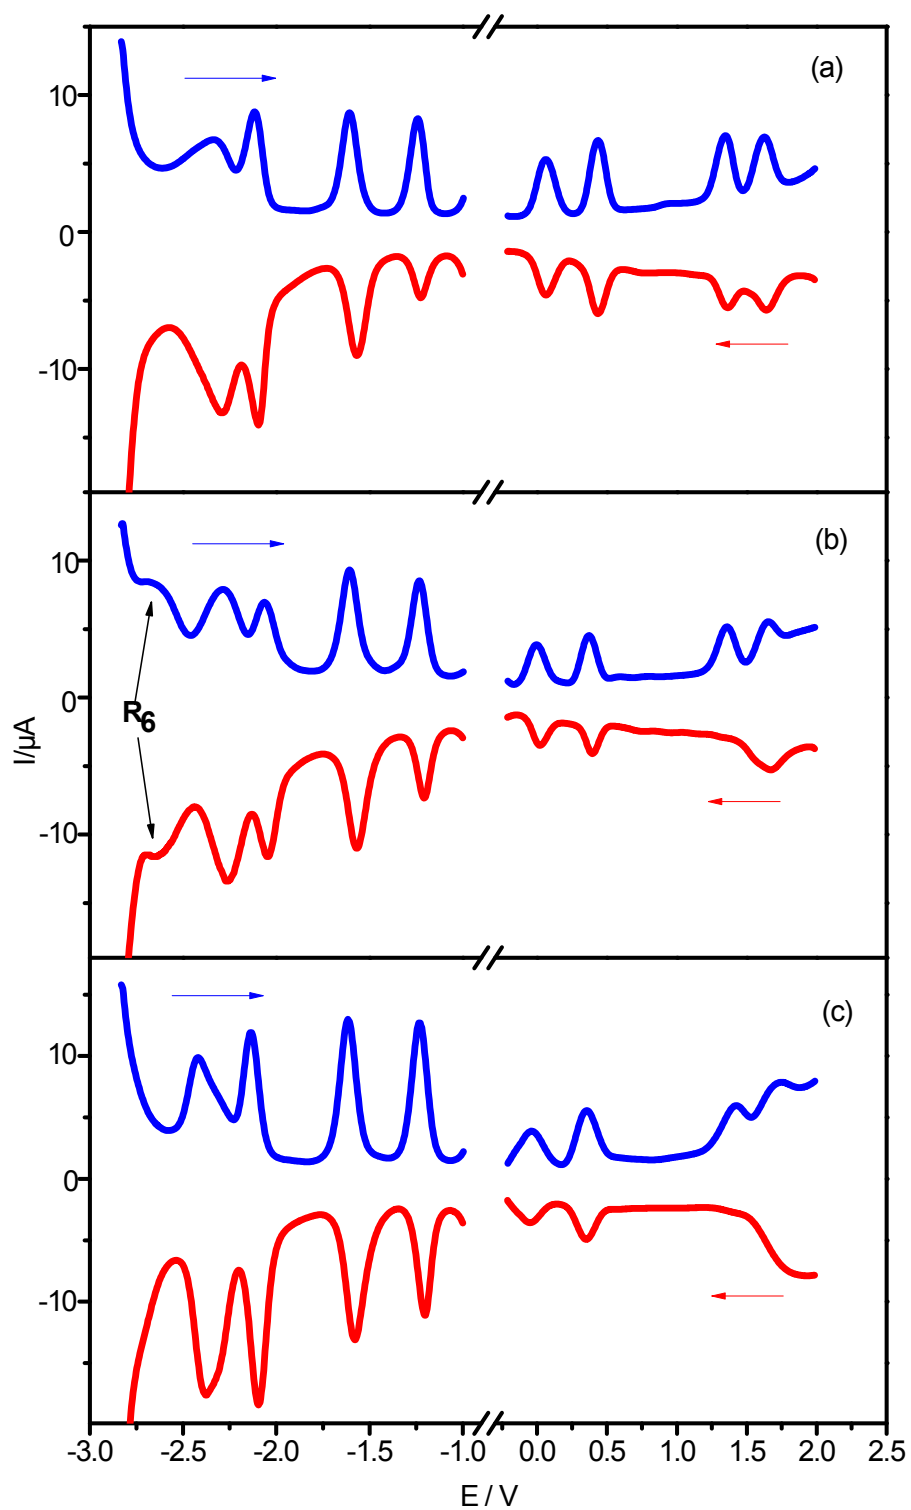

**Figure S5.** SWV of  $\text{LnPc}^*_2$  on Pt (glassy carbon) in DCM/TBAP (-0.2 ~ 2 V) and DMF/TBAP (-2.8 ~ -1 V), SWV parameters: pulse size = 100 mV; step size: 5 mV; frequency: 25 Hz. (a)  $\text{EuPc}^*_2$ ; (a)  $\text{ErPc}^*_2$ ; (a)  $\text{LuPc}^*_2$ ;

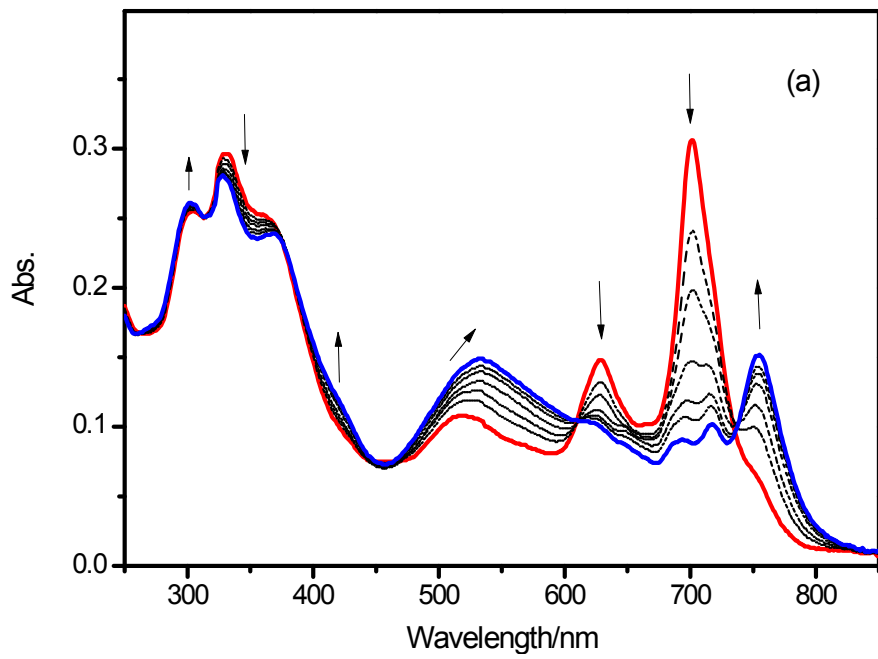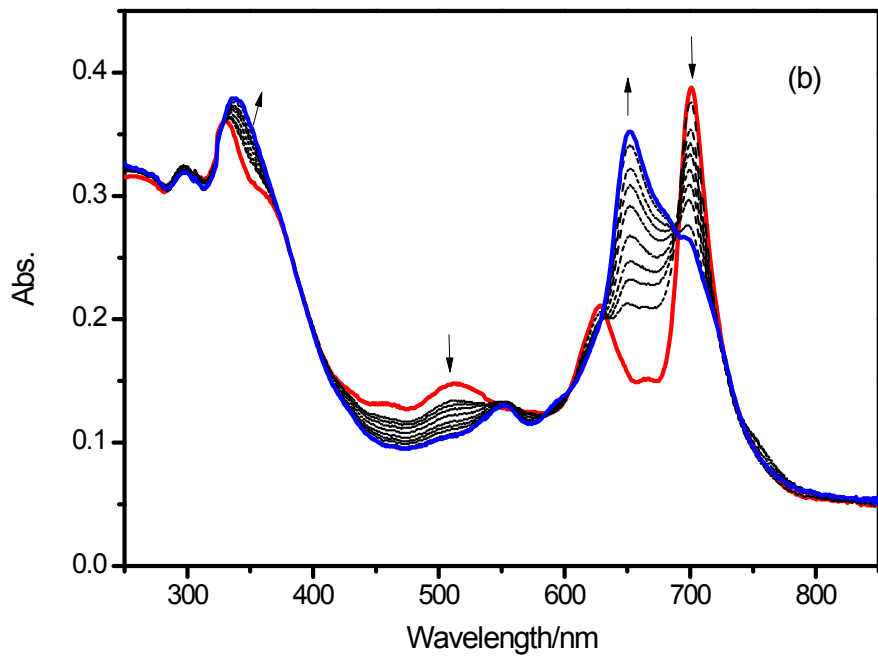

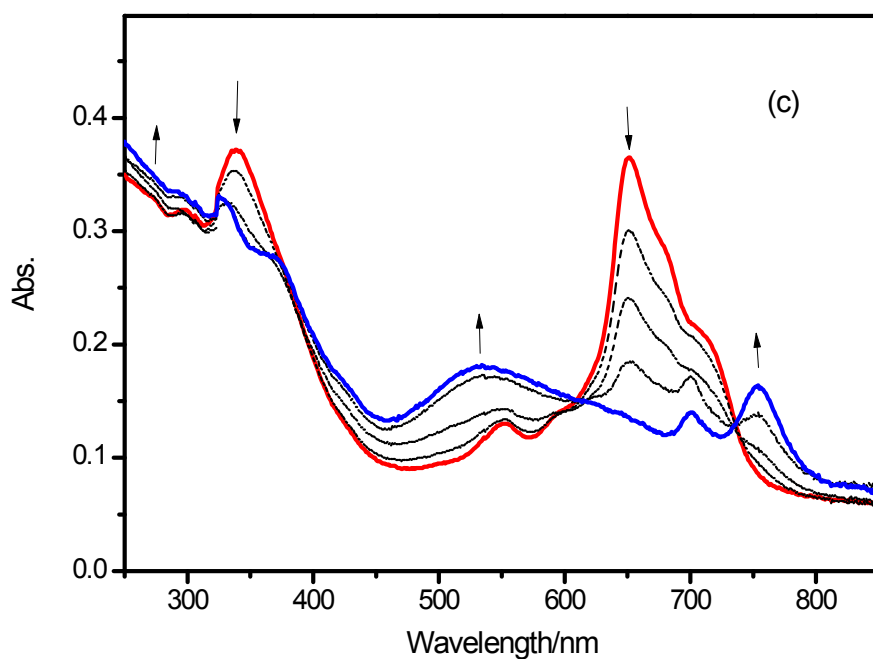

**Figure S6.** *In-situ* UV/Vis spectral changes of ErPc\*<sub>2</sub> in DCM containing 1M TBAP at (a) 0.8 V; (b) -0.2 V; (c) -1.4 V. (vs. SCE)

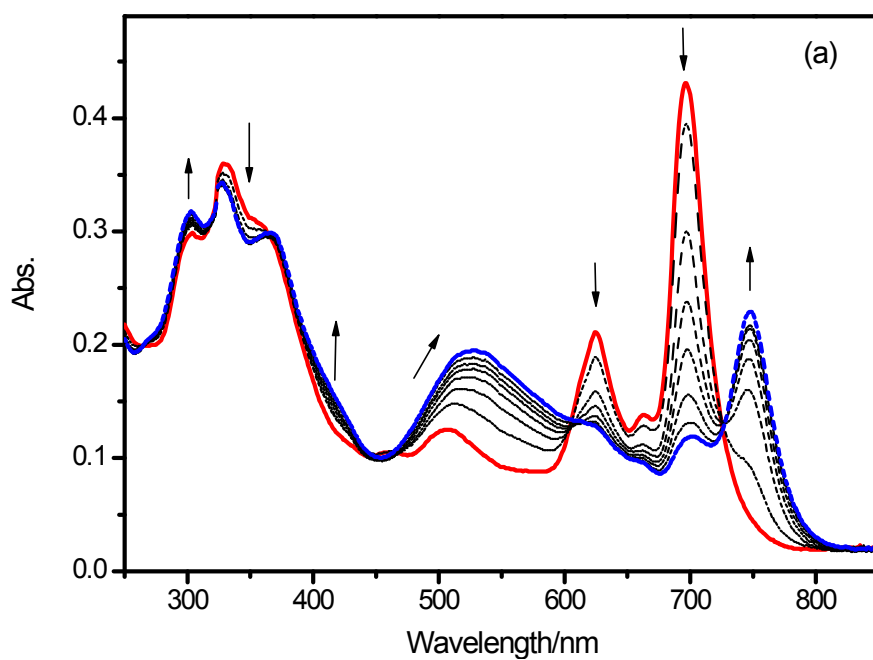

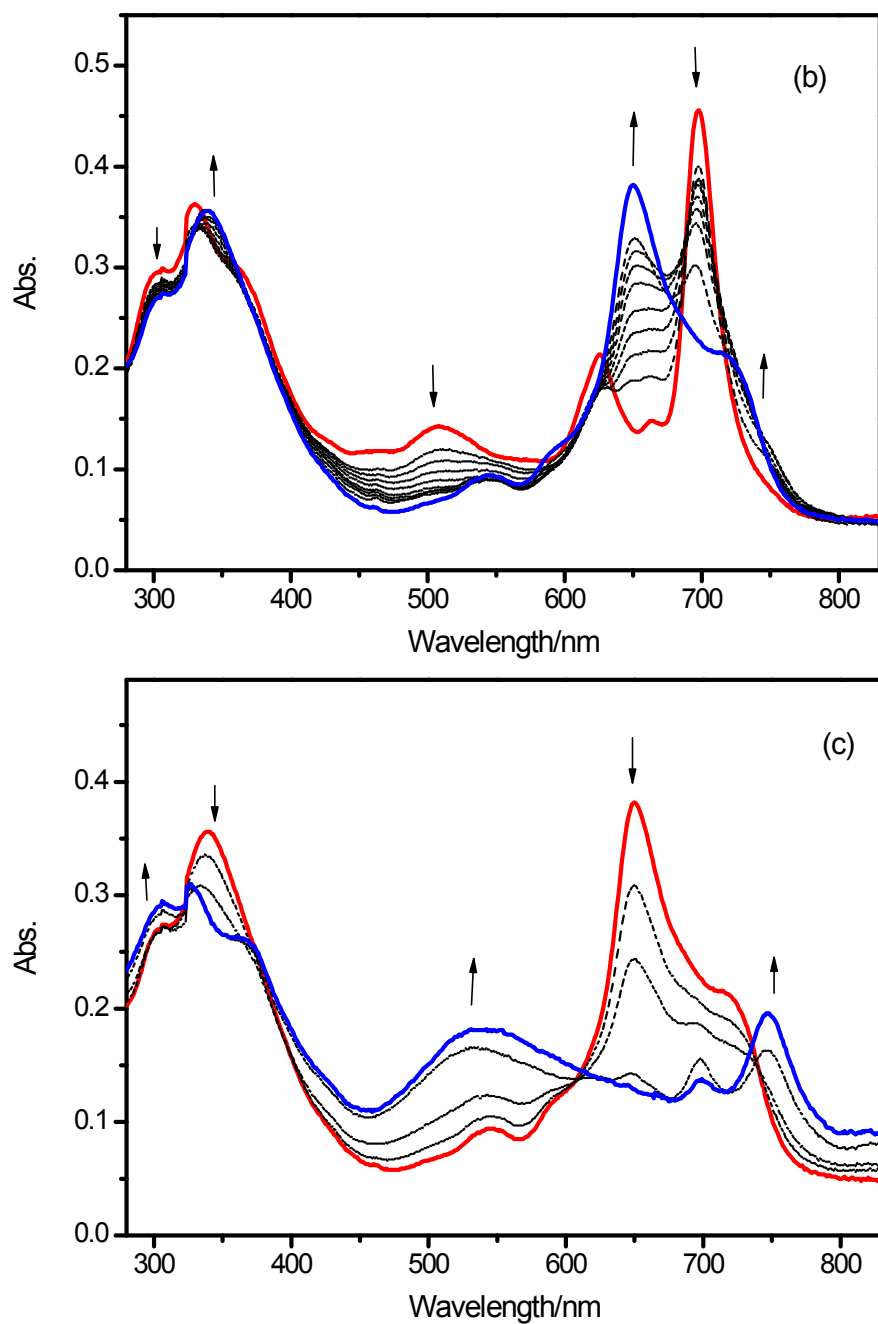

**Figure S7.** *In-situ* UV/Vis spectral changes of LuPc\*<sub>2</sub> in DCM containing 1M TBAP at (a) 0.8 V; (b) -0.2 V; (c) -1.4 V. (vs. SCE)



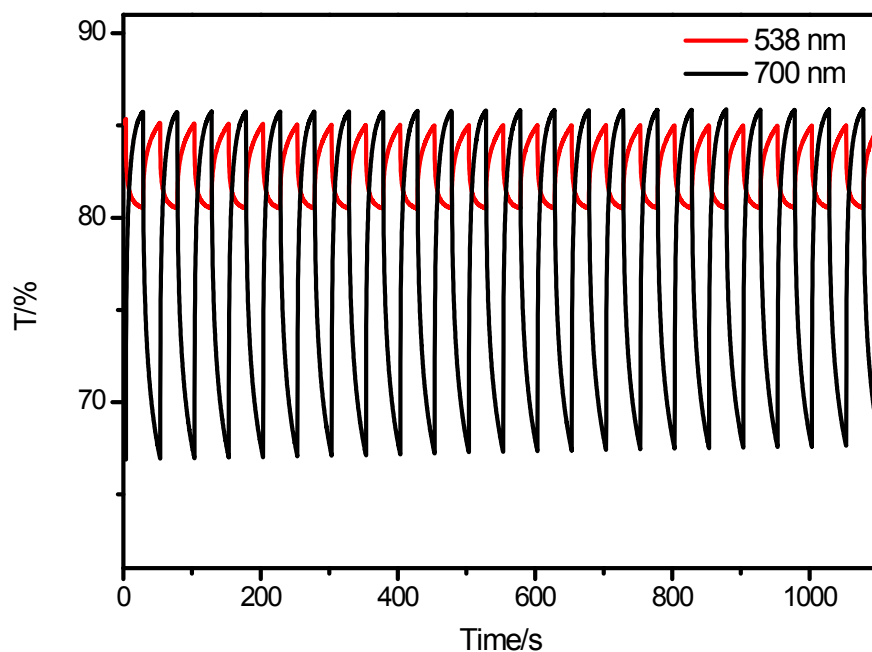

**Figure S8.** T% changes of  $\text{ErPc}^*_2/\text{ITO}$  at two wavelenghtes versus time by repeating the potential steps using 0 V and +1.0 V with a residence time of 25 s in  $\text{H}_2\text{O}/\text{LiClO}_4$  electrolyte system.

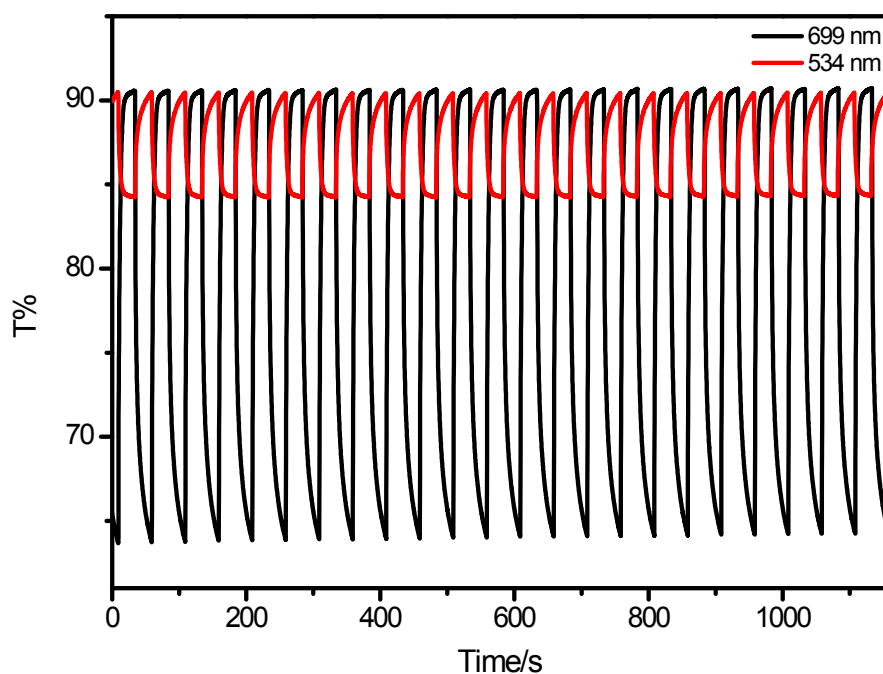

**Figure S9.** T% changes of  $\text{LuPc}^*_2/\text{ITO}$  at two wavelenghtes versus time by repeating the potential steps using 0 V and +1.0 V with a residence time of 25 s in  $\text{H}_2\text{O}/\text{LiClO}_4$  electrolyte system.

**Table S1.** Maximum concentration of **LnPc\*<sub>2</sub>** dissolved in different solvent .

| Solvent              | Polarity | Solubility (mol/L)       |                          |                          |
|----------------------|----------|--------------------------|--------------------------|--------------------------|
|                      |          | <b>EuPc*<sub>2</sub></b> | <b>ErPc*<sub>2</sub></b> | <b>LuPc*<sub>2</sub></b> |
| n-pentane            | 0        | 0.38                     | 0.36                     | 0.40                     |
| Ethyl ether          | 2.9      | 0.10                     | 0.15                     | 0.13                     |
| Methylene dichloride | 3.4      | 0.12                     | 0.18                     | 0.20                     |
| Tetrahydrofuran      | 4.2      | 0.20                     | 0.23                     | 0.25                     |
| Ethyl acetate        | 4.3      | 0.09                     | 0.08                     | 0.08                     |
| Chloroform           | 4.4      | 0.24                     | 0.29                     | 0.30                     |
| Acetone              | 5.4      | 0.10                     | 0.08                     | 0.12                     |
| Acetonitrile         | 6.2      | $5 \times 10^{-4}$       | $5 \times 10^{-4}$       | $4 \times 10^{-4}$       |
| Dimethyl formamide   | 6.4      | $2.5 \times 10^{-2}$     | $1.2 \times 10^{-2}$     | $1.6 \times 10^{-2}$     |
| Methanol             | 6.6      | $1.5 \times 10^{-3}$     | $1.3 \times 10^{-3}$     | $2.2 \times 10^{-3}$     |
| Dimethyl sulfoxide   | 7.2      | $1.6 \times 10^{-3}$     | $2.5 \times 10^{-3}$     | $1.8 \times 10^{-3}$     |
| Water                | 10.2     | -                        | -                        | -                        |

**Table S2.** UV/Vis/NIR absorption data for **LnPc\*<sub>2</sub>**.

|                    | $\lambda$ [nm] ( $\epsilon$ [10 <sup>4</sup> L·cm <sup>-1</sup> ·mol <sup>-1</sup> ]) |             |              |                  |              |                            |                              |
|--------------------|---------------------------------------------------------------------------------------|-------------|--------------|------------------|--------------|----------------------------|------------------------------|
|                    | N                                                                                     | B (soret)   | Blue valence | Q <sub>vib</sub> | Q            | Red valence <sup>[a]</sup> | Inter valence <sup>[a]</sup> |
| EuPc* <sub>2</sub> | 300 (6.596)                                                                           | 332(9.058)  | 525 (2.289)  | 633 (5.048)      | 709 (9.616)  | 932 (0.221)                | 1944 (0.952)                 |
| ErPc* <sub>2</sub> | 302 (4.447)                                                                           | 330 (5.496) | 516 (4.027)  | 627 (2.531)      | 699 (6.992)  | 938 (0.203)                | 1693 (0.531)                 |
| LuPc* <sub>2</sub> | 304 (5.654)                                                                           | 329 (7.044) | 504 (1.751)  | 623 (3.048)      | 696 (10.298) | 945 (0.330)                | 1620 (0.844)                 |

<sup>[a]</sup> measured in CCl<sub>4</sub>.

**Table S3.** Coloration efficiency of **LnPc\*<sub>2</sub>**.

| $\lambda$                       | E (V)       | CE / cm <sup>2</sup> ·C <sup>-1</sup> |
|---------------------------------|-------------|---------------------------------------|
| 538 nm<br>(EuPc* <sub>2</sub> ) | 0.0<br>+1.0 | 196.56<br>204.48                      |
| 538 nm<br>(ErPc* <sub>2</sub> ) | 0.0<br>+1.0 | 224.00<br>229.83                      |
| 534 nm<br>(LuPc* <sub>2</sub> ) | 0.0<br>+1.0 | 284.06<br>145.41                      |
| 708 nm<br>(EuPc* <sub>2</sub> ) | 0.0<br>+1.0 | 823.63<br>841.51                      |
| 700 nm<br>(ErPc* <sub>2</sub> ) | 0.0<br>+1.0 | 963.62<br>956.84                      |
| 699 nm<br>(LuPc* <sub>2</sub> ) | 0.0<br>+1.0 | 1356.01<br>830.45                     |
